# Supplementary material
Source: PubMed Central journal article supplement (PMC11144996)
Supplement: izad269_suppl_supplementary_figure_s1.pdf [file izad269_suppl_supplementary_figure_s1.pdf]

# **An atlas characterizing the shared genetic architecture of inflammatory bowel disease with clinical and behavioral traits (Supplementary materials)**

## **AUTHORS**

Vikram R. Shaw MS<sup>1</sup>,

Jinyoung Byun PhD<sup>1-3</sup>,

Rowland W. Pettit MD,PhD<sup>1</sup>,

Jason K. Hou MD,MS<sup>4</sup>,

Kyle M. Walsh, PhD<sup>5</sup>,

Younghun Han PhD<sup>1-2</sup>,

Christopher I. Amos PhD<sup>1-3,\*</sup>

**Supplementary Table 1** (separate Excel file): Traits achieving at least nominal significance ( $p < 0.05$ ) in IBD analysis.

**Supplementary Table 2** (separate Excel file): Traits achieving at least nominal significance ( $p < 0.05$ ) in CD analysis.

**Supplementary Table 3** (separate Excel file): Traits achieving at least nominal significance ( $p < 0.05$ ) in UC analysis.

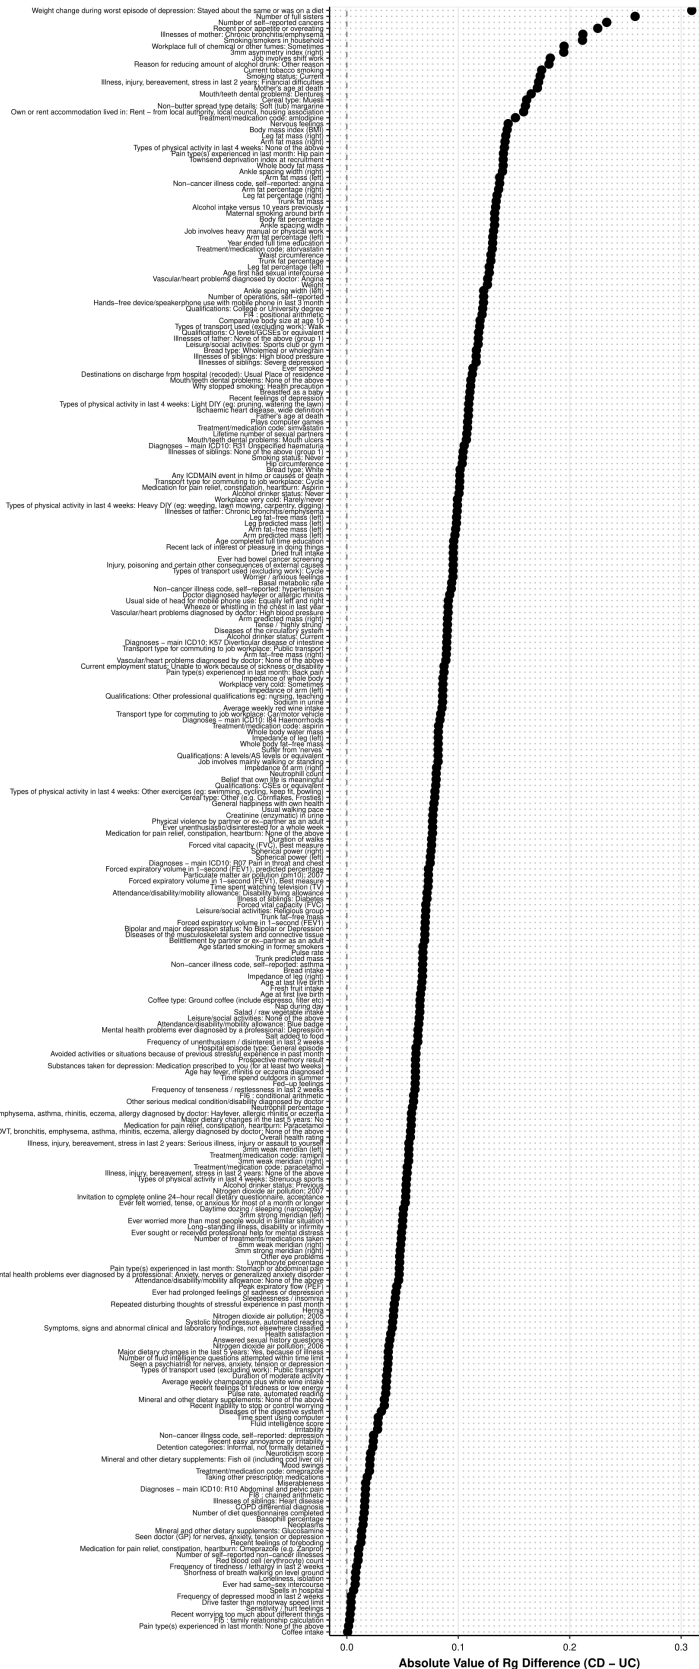

**Supplementary Figure 1.**  
 Forest plot showing absolute value of differences in genetic correlations ( $r_g$ ) between CD and UC. All traits included in Figures 3-7 were included in this plot.
